# Supplementary material for: Reassortment patterns of avian influenza virus internal segments among different subtypes
Source: PubMed Central journal article supplement (PMC3905155; doi:10.1186/1471-2148-14-16), 2014-01-24
Supplement: 1471-2148-14-16-S2.pdf [file 1471-2148-14-16-S2.pdf]

Table S1 Number of sequences by subtype in each subgroup

| Group | H1N1 | H3N8 | H4N6 | H5N1 | H5N2 | H5N3 | H6N1 | H6N2 | H6N5 | H7N1 | H7N3 | H7N7 | H9N2 | SUM |
|-------|------|------|------|------|------|------|------|------|------|------|------|------|------|-----|
| A1    | 7    | 19   | 12   | 100  | 17   | 12   | 31   | 36   | 10   | 10   | 12   | 9    | 68   | 344 |
| A2    | 7    | 18   | 12   | 129  | 16   | 12   | 29   | 24   | 8    | 10   | 10   | 8    | 61   | 344 |
| A3    | 7    | 19   | 12   | 126  | 17   | 12   | 30   | 23   | 8    | 10   | 10   | 8    | 61   | 344 |
| B     | 7    | 18   | 12   | 10   | 16   | 12   | 29   | 24   | 8    | 10   | 10   | 8    | 61   | 225 |
| C     | 7    | 10   | 10   | 10   | 10   | 10   | 10   | 10   | 10   | 10   | 10   | 9    | 10   | 127 |

Table S2 Matrix of reassortment rate between pairs of subtypes (HA, NA and HA-NA combined) of 6 internal segments. Reassortment rates in this table are represented as heat map in figure 2. Both forward and reverse rates are shown, with subtypes labeled on the left side acting as donors and subtypes labeled at the bottom acting as recipients. The values of the mean reassortment rates, in exchanges per year. The transition rates with  $BF < 3$  (the estimated indicator for HA/NA subtype  $< 0.3$ , for HA-NA subtype  $< 0.2$ ) are labelled in grey.

|     |      | HA   |      |      |      |      |      |  |
|-----|------|------|------|------|------|------|------|--|
| PB2 | H1   | H3   | H4   | H5   | H6   | H7   | H9   |  |
| H1  |      | 0.55 | 0.51 | 0.46 | 0.45 | 0.50 | 0.33 |  |
| H3  | 0.34 |      | 0.42 | 0.42 | 0.40 | 0.26 | 0.24 |  |
| H4  | 0.53 | 0.63 |      | 0.39 | 0.46 | 0.32 | 0.30 |  |
| H5  | 0.08 | 0.09 | 0.11 |      | 0.04 | 0.03 | 0.02 |  |
| H6  | 0.08 | 0.15 | 0.10 | 0.05 |      | 0.05 | 0.08 |  |
| H7  | 0.22 | 0.28 | 0.16 | 0.16 | 0.11 |      | 0.05 |  |
| H9  | 0.02 | 0.02 | 0.02 | 0.01 | 0.03 | 0.02 |      |  |
| PB1 | H1   | H3   | H4   | H5   | H6   | H7   | H9   |  |
| H1  |      | 0.63 | 0.62 | 0.40 | 0.68 | 0.59 | 0.30 |  |
| H3  | 0.35 |      | 0.47 | 0.25 | 0.45 | 0.42 | 0.14 |  |
| H4  | 0.46 | 0.64 |      | 0.37 | 0.62 | 0.50 | 0.19 |  |
| H5  | 0.05 | 0.04 | 0.04 |      | 0.02 | 0.05 | 0.03 |  |
| H6  | 0.11 | 0.13 | 0.13 | 0.10 |      | 0.07 | 0.03 |  |
| H7  | 0.30 | 0.31 | 0.31 | 0.12 | 0.24 |      | 0.12 |  |
| H9  | 0.05 | 0.05 | 0.05 | 0.03 | 0.06 | 0.04 |      |  |
| PA  | H1   | H3   | H4   | H5   | H6   | H7   | H9   |  |
| H1  |      | 0.40 | 0.39 | 0.28 | 0.50 | 0.37 | 0.41 |  |
| H3  | 0.28 |      | 0.56 | 0.26 | 0.51 | 0.30 | 0.23 |  |
| H4  | 0.32 | 0.83 |      | 0.56 | 0.81 | 0.36 | 0.28 |  |
| H5  | 0.04 | 0.05 | 0.06 |      | 0.05 | 0.04 | 0.03 |  |
| H6  | 0.06 | 0.20 | 0.23 | 0.09 |      | 0.05 | 0.04 |  |
| H7  | 0.14 | 0.17 | 0.17 | 0.07 | 0.19 |      | 0.08 |  |
| H9  | 0.04 | 0.04 | 0.04 | 0.03 | 0.05 | 0.03 |      |  |
| NP  | H1   | H3   | H4   | H5   | H6   | H7   | H9   |  |
| H1  |      | 0.46 | 0.49 | 0.38 | 0.52 | 0.44 | 0.42 |  |
| H3  | 0.31 |      | 0.45 | 0.23 | 0.29 | 0.28 | 0.14 |  |
| H4  | 0.40 | 0.58 |      | 0.42 | 0.42 | 0.40 | 0.25 |  |
| H5  | 0.02 | 0.02 | 0.03 |      | 0.02 | 0.03 | 0.02 |  |
| H6  | 0.08 | 0.16 | 0.14 | 0.05 |      | 0.07 | 0.02 |  |
| H7  | 0.23 | 0.21 | 0.24 | 0.10 | 0.23 |      | 0.10 |  |
| H9  | 0.05 | 0.04 | 0.04 | 0.04 | 0.03 | 0.03 |      |  |
| M   | H1   | H3   | H4   | H5   | H6   | H7   | H9   |  |
| H1  |      | 0.71 | 0.69 | 0.42 | 0.62 | 0.49 | 0.31 |  |
| H3  | 0.38 |      | 0.75 | 0.33 | 0.58 | 0.26 | 0.16 |  |
| H4  | 0.48 | 0.88 |      | 0.46 | 0.76 | 0.36 | 0.24 |  |
| H5  | 0.03 | 0.03 | 0.03 |      | 0.03 | 0.03 | 0.02 |  |
| H6  | 0.13 | 0.22 | 0.19 | 0.06 |      | 0.05 | 0.03 |  |
| H7  | 0.19 | 0.19 | 0.18 | 0.09 | 0.15 |      | 0.05 |  |
| H9  | 0.03 | 0.03 | 0.03 | 0.02 | 0.03 | 0.02 |      |  |
| NS  | H1   | H3   | H4   | H5   | H6   | H7   | H9   |  |
| H1  |      | 1.62 | 1.50 | 0.81 | 1.28 | 0.98 | 0.69 |  |
| H3  | 0.92 |      | 1.14 | 0.46 | 0.79 | 0.55 | 0.32 |  |
| H4  | 1.06 | 1.20 |      | 0.67 | 1.06 | 0.58 | 0.38 |  |
| H5  | 0.09 | 0.09 | 0.09 |      | 0.05 | 0.04 | 0.03 |  |
| H6  | 0.24 | 0.31 | 0.28 | 0.08 |      | 0.14 | 0.06 |  |
| H7  | 0.38 | 0.43 | 0.43 | 0.13 | 0.23 |      | 0.09 |  |
| H9  | 0.05 | 0.04 | 0.04 | 0.03 | 0.04 | 0.04 |      |  |
|     |      | NA   |      |      |      |      |      |  |
| PB2 | N1   | N2   | N3   | N5   | N6   | N7   | N8   |  |
| N1  |      | 0.08 | 0.04 | 0.07 | 0.06 | 0.05 | 0.08 |  |
| N2  | 0.05 |      | 0.03 | 0.06 | 0.13 | 0.06 | 0.13 |  |

|     |      |      |      |      |      |      |      |
|-----|------|------|------|------|------|------|------|
| N3  | 0.18 | 0.14 |      | 0.27 | 0.39 | 0.27 | 0.37 |
| N5  | 0.44 | 0.67 | 0.56 |      | 0.58 | 0.52 | 0.58 |
| N6  | 0.58 | 0.76 | 0.66 | 0.63 |      | 0.56 | 0.97 |
| N7  | 0.39 | 0.54 | 0.63 | 0.57 | 0.53 |      | 0.59 |
| N8  | 0.36 | 0.50 | 0.40 | 0.39 | 0.87 | 0.36 |      |
| PB1 | N1   | N2   | N3   | N5   | N6   | N7   | N8   |
| N1  |      | 0.06 | 0.05 | 0.04 | 0.09 | 0.09 | 0.06 |
| N2  | 0.07 |      | 0.06 | 0.04 | 0.06 | 0.10 | 0.06 |
| N3  | 0.18 | 0.22 |      | 0.25 | 0.35 | 0.36 | 0.31 |
| N5  | 0.30 | 0.37 | 0.41 |      | 0.62 | 0.56 | 0.64 |
| N6  | 0.38 | 0.53 | 0.53 | 0.53 |      | 0.74 | 0.79 |
| N7  | 0.82 | 1.15 | 0.76 | 0.59 | 0.86 |      | 0.87 |
| N8  | 0.25 | 0.33 | 0.41 | 0.41 | 0.58 | 0.56 |      |
| PA  | N1   | N2   | N3   | N5   | N6   | N7   | N8   |
| N1  |      | 0.09 | 0.04 | 0.08 | 0.08 | 0.06 | 0.07 |
| N2  | 0.06 |      | 0.10 | 0.11 | 0.14 | 0.10 | 0.13 |
| N3  | 0.17 | 0.23 |      | 0.30 | 0.35 | 0.30 | 0.36 |
| N5  | 0.57 | 0.82 | 0.38 |      | 0.81 | 0.45 | 0.79 |
| N6  | 0.59 | 0.76 | 0.45 | 0.89 |      | 0.49 | 0.93 |
| N7  | 0.45 | 0.48 | 0.55 | 0.63 | 0.69 |      | 0.74 |
| N8  | 0.39 | 0.44 | 0.34 | 0.66 | 0.72 | 0.39 |      |
| NP  | N1   | N2   | N3   | N5   | N6   | N7   | N8   |
| N1  |      | 0.05 | 0.03 | 0.04 | 0.04 | 0.04 | 0.06 |
| N2  | 0.09 |      | 0.06 | 0.06 | 0.08 | 0.04 | 0.07 |
| N3  | 0.12 | 0.20 |      | 0.19 | 0.26 | 0.18 | 0.22 |
| N5  | 0.25 | 0.45 | 0.23 |      | 0.44 | 0.34 | 0.42 |
| N6  | 0.26 | 0.44 | 0.31 | 0.43 |      | 0.37 | 0.44 |
| N7  | 0.26 | 0.36 | 0.33 | 0.42 | 0.50 |      | 0.46 |
| N8  | 0.18 | 0.37 | 0.22 | 0.29 | 0.34 | 0.26 |      |
| M   | N1   | N2   | N3   | N5   | N6   | N7   | N8   |
| N1  |      | 0.04 | 0.04 | 0.03 | 0.03 | 0.03 | 0.03 |
| N2  | 0.04 |      | 0.43 | 0.69 | 0.09 | 0.06 | 0.11 |
| N3  | 0.13 | 0.15 |      | 0.25 | 0.31 | 0.22 | 0.31 |
| N5  | 0.42 | 0.52 | 0.42 |      | 0.76 | 0.36 | 0.78 |
| N6  | 0.45 | 0.58 | 0.43 | 0.69 |      | 0.58 | 0.93 |
| N7  | 0.26 | 0.27 | 0.35 | 0.40 | 0.44 |      | 0.43 |
| N8  | 0.32 | 0.46 | 0.34 | 0.54 | 0.71 | 0.25 |      |
| NS  | N1   | N2   | N3   | N5   | N6   | N7   | N8   |
| N1  |      | 0.08 | 0.04 | 0.05 | 0.04 | 0.04 | 0.05 |
| N2  | 0.05 |      | 0.13 | 0.16 | 0.17 | 0.13 | 0.20 |
| N3  | 0.22 | 0.36 |      | 0.57 | 0.77 | 0.48 | 0.75 |
| N5  | 0.64 | 0.82 | 1.06 |      | 1.14 | 0.92 | 1.13 |
| N6  | 0.53 | 0.97 | 1.12 | 0.91 |      | 0.84 | 1.45 |
| N7  | 0.64 | 0.81 | 1.01 | 0.98 | 1.05 |      | 1.12 |
| N8  | 0.42 | 0.83 | 0.85 | 0.77 | 1.17 | 0.69 |      |

| HA-NA |      |      |      |      |      |      |      |      |      |      |      |      |      |
|-------|------|------|------|------|------|------|------|------|------|------|------|------|------|
| PB2   | H1N1 | H3N8 | H4N6 | H5N1 | H5N2 | H5N3 | H6N1 | H6N2 | H6N5 | H7N1 | H7N3 | H7N7 | H9N2 |
| H1N1  |      | 0.64 | 0.62 | 0.31 | 0.67 | 0.69 | 0.25 | 0.47 | 0.48 | 0.52 | 0.28 | 0.53 | 0.34 |
| H3N8  | 0.40 |      | 0.65 | 0.16 | 0.55 | 0.50 | 0.16 | 0.46 | 0.33 | 0.30 | 0.14 | 0.31 | 0.18 |
| H4N6  | 0.57 | 0.68 |      | 0.24 | 0.78 | 0.73 | 0.20 | 0.58 | 0.47 | 0.42 | 0.19 | 0.44 | 0.26 |
| H5N1  | 0.03 | 0.03 | 0.03 |      | 0.03 | 0.03 | 0.03 | 0.03 | 0.03 | 0.03 | 0.03 | 0.03 | 0.03 |
| H5N2  | 0.45 | 0.65 | 0.52 | 0.17 |      | 0.55 | 0.15 | 0.41 | 0.33 | 0.35 | 0.16 | 0.37 | 0.19 |
| H5N3  | 0.48 | 0.57 | 0.60 | 0.20 | 0.59 |      | 0.12 | 0.41 | 0.34 | 0.35 | 0.15 | 0.36 | 0.18 |
| H6N1  | 0.08 | 0.12 | 0.09 | 0.05 | 0.09 | 0.09 |      | 0.15 | 0.13 | 0.07 | 0.06 | 0.11 | 0.18 |
| H6N2  | 0.21 | 0.35 | 0.27 | 0.10 | 0.32 | 0.24 | 0.15 |      | 0.30 | 0.17 | 0.08 | 0.20 | 0.12 |
| H6N5  | 0.42 | 0.72 | 0.49 | 0.31 | 0.57 | 0.49 | 0.33 | 0.67 |      | 0.38 | 0.22 | 0.44 | 0.39 |
| H7N1  | 0.48 | 0.49 | 0.41 | 0.21 | 0.52 | 0.52 | 0.15 | 0.35 | 0.37 |      | 0.28 | 0.41 | 0.21 |
| H7N3  | 0.25 | 0.25 | 0.22 | 0.13 | 0.31 | 0.25 | 0.15 | 0.19 | 0.18 | 0.27 |      | 0.34 | 0.16 |
| H7N7  | 0.48 | 0.54 | 0.44 | 0.26 | 0.56 | 0.50 | 0.24 | 0.45 | 0.42 | 0.42 | 0.26 |      | 0.33 |
| H9N2  | 0.02 | 0.02 | 0.03 | 0.02 | 0.02 | 0.02 | 0.04 | 0.02 | 0.02 | 0.02 | 0.02 | 0.02 |      |
| PB1   | H1N1 | H3N8 | H4N6 | H5N1 | H5N2 | H5N3 | H6N1 | H6N2 | H6N5 | H7N1 | H7N3 | H7N7 | H9N2 |
| H1N1  |      | 0.78 | 0.80 | 0.27 | 0.75 | 0.87 | 0.47 | 0.85 | 0.61 | 0.58 | 0.24 | 0.73 | 0.24 |
| H3N8  | 0.45 |      | 0.56 | 0.12 | 0.65 | 0.58 | 0.31 | 0.63 | 0.36 | 0.30 | 0.13 | 0.47 | 0.15 |
| H4N6  | 0.61 | 0.85 |      | 0.20 | 0.80 | 0.81 | 0.47 | 0.85 | 0.48 | 0.39 | 0.19 | 0.66 | 0.20 |
| H5N1  | 0.05 | 0.04 | 0.04 |      | 0.04 | 0.05 | 0.05 | 0.04 | 0.06 | 0.06 | 0.02 | 0.05 | 0.03 |

|      |      |      |      |      |      |      |      |      |      |      |      |      |      |
|------|------|------|------|------|------|------|------|------|------|------|------|------|------|
| H5N2 | 0.53 | 0.68 | 0.67 | 0.15 |      | 0.72 | 0.37 | 0.76 | 0.38 | 0.31 | 0.16 | 0.58 | 0.22 |
| H5N3 | 0.62 | 0.75 | 0.75 | 0.18 | 0.87 |      | 0.47 | 0.86 | 0.49 | 0.37 | 0.17 | 0.70 | 0.19 |
| H6N1 | 0.13 | 0.15 | 0.20 | 0.07 | 0.25 | 0.20 |      | 0.31 | 0.13 | 0.11 | 0.07 | 0.21 | 0.08 |
| H6N2 | 0.30 | 0.44 | 0.44 | 0.07 | 0.57 | 0.45 | 0.28 |      | 0.22 | 0.16 | 0.07 | 0.33 | 0.10 |
| H6N5 | 0.48 | 0.59 | 0.57 | 0.22 | 0.55 | 0.53 | 0.41 | 0.57 |      | 0.39 | 0.22 | 0.49 | 0.24 |
| H7N1 | 0.54 | 0.51 | 0.52 | 0.22 | 0.47 | 0.54 | 0.34 | 0.52 | 0.40 |      | 0.20 | 0.45 | 0.22 |
| H7N3 | 0.12 | 0.14 | 0.13 | 0.38 | 0.15 | 0.13 | 0.15 | 0.15 | 0.10 | 0.12 |      | 0.15 | 0.17 |
| H7N7 | 0.55 | 0.67 | 0.69 | 0.51 | 0.80 | 0.70 | 0.49 | 0.88 | 0.51 | 0.42 | 0.36 |      | 0.60 |
| H9N2 | 0.05 | 0.05 | 0.05 | 0.03 | 0.05 | 0.05 | 0.05 | 0.05 | 0.04 | 0.05 | 0.04 | 0.05 |      |
| PA   | H1N1 | H3N8 | H4N6 | H5N1 | H5N2 | H5N3 | H6N1 | H6N2 | H6N5 | H7N1 | H7N3 | H7N7 | H9N2 |
| H1N1 |      | 0.47 | 0.48 | 0.27 | 0.51 | 0.52 | 0.37 | 0.37 | 0.48 | 0.39 | 0.26 | 0.42 | 0.36 |
| H3N8 | 0.30 |      | 0.58 | 0.12 | 0.56 | 0.60 | 0.23 | 0.39 | 0.42 | 0.21 | 0.11 | 0.39 | 0.15 |
| H4N6 | 0.33 | 0.72 |      | 0.25 | 0.86 | 0.76 | 0.40 | 0.51 | 0.74 | 0.26 | 0.15 | 0.42 | 0.26 |
| H5N1 | 0.03 | 0.03 | 0.03 |      | 0.03 | 0.03 | 0.03 | 0.02 | 0.03 | 0.04 | 0.04 | 0.03 | 0.07 |
| H5N2 | 0.27 | 0.51 | 0.66 | 0.22 |      | 0.68 | 0.32 | 0.40 | 0.65 | 0.22 | 0.12 | 0.30 | 0.18 |
| H5N3 | 0.34 | 0.62 | 0.68 | 0.27 | 0.86 |      | 0.37 | 0.42 | 0.72 | 0.27 | 0.16 | 0.42 | 0.25 |
| H6N1 | 0.16 | 0.20 | 0.21 | 0.06 | 0.17 | 0.19 |      | 0.16 | 0.16 | 0.13 | 0.09 | 0.15 | 0.12 |
| H6N2 | 0.12 | 0.35 | 0.31 | 0.06 | 0.23 | 0.24 | 0.15 |      | 0.29 | 0.12 | 0.06 | 0.19 | 0.06 |
| H6N5 | 0.27 | 0.58 | 0.54 | 0.24 | 0.48 | 0.44 | 0.45 | 0.88 |      | 0.22 | 0.16 | 0.30 | 0.19 |
| H7N1 | 0.31 | 0.37 | 0.35 | 0.15 | 0.32 | 0.35 | 0.27 | 0.30 | 0.33 |      | 0.23 | 0.32 | 0.23 |
| H7N3 | 0.16 | 0.17 | 0.18 | 0.13 | 0.17 | 0.17 | 0.15 | 0.17 | 0.15 | 0.19 |      | 0.15 | 0.21 |
| H7N7 | 0.41 | 0.55 | 0.55 | 0.20 | 0.54 | 0.61 | 0.33 | 0.40 | 0.46 | 0.40 | 0.23 |      | 0.29 |
| H9N2 | 0.04 | 0.04 | 0.05 | 0.03 | 0.05 | 0.05 | 0.06 | 0.05 | 0.05 | 0.04 | 0.03 | 0.04 |      |
| NP   | H1N1 | H3N8 | H4N6 | H5N1 | H5N2 | H5N3 | H6N1 | H6N2 | H6N5 | H7N1 | H7N3 | H7N7 | H9N2 |
| H1N1 |      | 0.51 | 0.63 | 0.31 | 0.59 | 0.49 | 0.35 | 0.48 | 0.52 | 0.37 | 0.24 | 0.54 | 0.38 |
| H3N8 | 0.33 |      | 0.42 | 0.10 | 0.48 | 0.50 | 0.16 | 0.40 | 0.29 | 0.22 | 0.11 | 0.30 | 0.12 |
| H4N6 | 0.43 | 0.53 |      | 0.16 | 0.56 | 0.50 | 0.24 | 0.56 | 0.53 | 0.27 | 0.14 | 0.41 | 0.21 |
| H5N1 | 0.03 | 0.02 | 0.02 |      | 0.02 | 0.02 | 0.03 | 0.03 | 0.02 | 0.02 | 0.03 | 0.03 | 0.03 |
| H5N2 | 0.40 | 0.44 | 0.45 | 0.22 |      | 0.50 | 0.14 | 0.33 | 0.27 | 0.21 | 0.12 | 0.33 | 0.29 |
| H5N3 | 0.42 | 0.49 | 0.46 | 0.27 | 0.62 |      | 0.20 | 0.36 | 0.29 | 0.26 | 0.16 | 0.41 | 0.38 |
| H6N1 | 0.08 | 0.11 | 0.09 | 0.04 | 0.08 | 0.08 |      | 0.17 | 0.14 | 0.09 | 0.08 | 0.08 | 0.05 |
| H6N2 | 0.18 | 0.36 | 0.27 | 0.05 | 0.28 | 0.25 | 0.11 |      | 0.24 | 0.13 | 0.06 | 0.16 | 0.05 |
| H6N5 | 0.29 | 0.42 | 0.42 | 0.12 | 0.30 | 0.28 | 0.25 | 0.69 |      | 0.21 | 0.15 | 0.28 | 0.13 |
| H7N1 | 0.34 | 0.32 | 0.40 | 0.29 | 0.35 | 0.36 | 0.30 | 0.36 | 0.38 |      | 0.20 | 0.36 | 0.41 |
| H7N3 | 0.20 | 0.21 | 0.20 | 0.16 | 0.20 | 0.19 | 0.27 | 0.24 | 0.18 | 0.19 |      | 0.20 | 0.22 |
| H7N7 | 0.49 | 0.45 | 0.57 | 0.28 | 0.51 | 0.43 | 0.29 | 0.46 | 0.47 | 0.32 | 0.23 |      | 0.41 |
| H9N2 | 0.04 | 0.04 | 0.04 | 0.03 | 0.03 | 0.04 | 0.03 | 0.03 | 0.04 | 0.03 | 0.03 | 0.03 |      |
| M    | H1N1 | H3N8 | H4N6 | H5N1 | H5N2 | H5N3 | H6N1 | H6N2 | H6N5 | H7N1 | H7N3 | H7N7 | H9N2 |
| H1N1 |      | 0.56 | 0.61 | 0.26 | 0.63 | 0.57 | 0.46 | 0.47 | 0.53 | 0.39 | 0.27 | 0.45 | 0.31 |
| H3N8 | 0.33 |      | 0.61 | 0.10 | 0.52 | 0.57 | 0.23 | 0.42 | 0.45 | 0.20 | 0.10 | 0.24 | 0.18 |
| H4N6 | 0.42 | 0.76 |      | 0.16 | 0.60 | 0.62 | 0.37 | 0.51 | 0.66 | 0.27 | 0.16 | 0.31 | 0.25 |
| H5N1 | 0.03 | 0.02 | 0.02 |      | 0.02 | 0.03 | 0.02 | 0.03 | 0.03 | 0.03 | 0.03 | 0.03 | 0.03 |
| H5N2 | 0.35 | 0.51 | 0.54 | 0.11 |      | 0.47 | 0.27 | 0.37 | 0.45 | 0.19 | 0.11 | 0.27 | 0.14 |
| H5N3 | 0.47 | 0.71 | 0.72 | 0.16 | 0.62 |      | 0.32 | 0.48 | 0.52 | 0.30 | 0.16 | 0.35 | 0.23 |
| H6N1 | 0.13 | 0.15 | 0.15 | 0.06 | 0.14 | 0.16 |      | 0.15 | 0.17 | 0.07 | 0.07 | 0.11 | 0.06 |
| H6N2 | 0.17 | 0.36 | 0.30 | 0.05 | 0.30 | 0.29 | 0.14 |      | 0.21 | 0.09 | 0.06 | 0.13 | 0.08 |
| H6N5 | 0.39 | 0.62 | 0.63 | 0.23 | 0.51 | 0.51 | 0.46 | 0.62 |      | 0.27 | 0.21 | 0.34 | 0.27 |
| H7N1 | 0.36 | 0.35 | 0.35 | 0.18 | 0.39 | 0.36 | 0.25 | 0.27 | 0.28 |      | 0.22 | 0.31 | 0.20 |
| H7N3 | 0.16 | 0.17 | 0.17 | 0.17 | 0.18 | 0.17 | 0.19 | 0.13 | 0.15 | 0.13 |      | 0.14 | 0.10 |
| H7N7 | 0.35 | 0.38 | 0.39 | 0.23 | 0.42 | 0.39 | 0.33 | 0.34 | 0.37 | 0.31 | 0.24 |      | 0.24 |
| H9N2 | 0.03 | 0.03 | 0.03 | 0.02 | 0.03 | 0.04 | 0.04 | 0.03 | 0.03 | 0.03 | 0.02 | 0.03 |      |
| NS   | H1N1 | H3N8 | H4N6 | H5N1 | H5N2 | H5N3 | H6N1 | H6N2 | H6N5 | H7N1 | H7N3 | H7N7 | H9N2 |
| H1N1 |      | 0.95 | 0.94 | 0.15 | 0.92 | 0.90 | 0.65 | 0.99 | 0.81 | 0.71 | 0.37 | 0.82 | 0.68 |
| H3N8 | 0.53 |      | 0.88 | 0.05 | 0.97 | 0.82 | 0.19 | 0.92 | 0.61 | 0.41 | 0.14 | 0.49 | 0.18 |
| H4N6 | 0.66 | 1.12 |      | 0.07 | 1.08 | 1.06 | 0.26 | 0.98 | 0.75 | 0.50 | 0.20 | 0.66 | 0.26 |
| H5N1 | 0.17 | 0.12 | 0.10 |      | 0.11 | 0.10 | 0.17 | 0.11 | 0.12 | 0.13 | 0.09 | 0.12 | 0.17 |
| H5N2 | 0.56 | 1.01 | 0.90 | 0.05 |      | 1.00 | 0.20 | 0.93 | 0.62 | 0.42 | 0.16 | 0.53 | 0.17 |
| H5N3 | 0.67 | 1.07 | 1.10 | 0.09 | 1.11 |      | 0.25 | 0.96 | 0.74 | 0.48 | 0.19 | 0.62 | 0.23 |
| H6N1 | 0.16 | 0.13 | 0.12 | 0.05 | 0.12 | 0.11 |      | 0.14 | 0.14 | 0.12 | 0.09 | 0.15 | 0.12 |
| H6N2 | 0.41 | 0.71 | 0.62 | 0.05 | 0.76 | 0.62 | 0.17 |      | 0.50 | 0.30 | 0.12 | 0.37 | 0.15 |
| H6N5 | 0.76 | 1.00 | 0.94 | 0.11 | 0.93 | 0.94 | 0.43 | 0.94 |      | 0.63 | 0.32 | 0.73 | 0.39 |
| H7N1 | 0.53 | 0.62 | 0.66 | 0.11 | 0.65 | 0.66 | 0.29 | 0.58 | 0.53 |      | 0.27 | 0.54 | 0.31 |
| H7N3 | 0.30 | 0.26 | 0.25 | 0.11 | 0.26 | 0.26 | 0.16 | 0.26 | 0.25 | 0.23 |      | 0.27 | 0.13 |
| H7N7 | 0.74 | 0.86 | 0.85 | 0.14 | 0.87 | 0.77 | 0.47 | 0.82 | 0.76 | 0.67 | 0.37 |      | 0.47 |
| H9N2 | 0.05 | 0.04 | 0.04 | 0.03 | 0.06 | 0.04 | 0.04 | 0.04 | 0.04 | 0.05 | 0.04 | 0.04 |      |

Table S3 Partial correlation between reassortment and domestic proportion or dN/dS ratio

|     | $R_{AB}$ | $R_{BC}$ | $R_{AC}$ | $R_{AB.C}$ | $t_{AB.C}$ | $P_{AB.C}$ | $R_{AC.B}$ | $t_{AC.B}$ | $P_{AC.B}$ |
|-----|----------|----------|----------|------------|------------|------------|------------|------------|------------|
| PB2 | -0.67    | 0.58     | -0.64    | -0.47      | 2.95       | 0.01       | -0.42      | 2.61       | 0.02       |
| PB1 | -0.69    | 0.46     | -0.74    | -0.59      | 3.87       | 0.003      | -0.66      | 4.75       | 0.001      |
| PA  | -0.86    | 0.57     | -0.68    | -0.79      | 7.67       | 0.0001     | -0.46      | 2.83       | 0.02       |
| NP  | -0.67    | 0.64     | -0.64    | -0.44      | 2.75       | 0.02       | -0.37      | 2.35       | 0.04       |
| M   | -0.78    | 0.71     | -0.62    | -0.62      | 4.19       | 0.002      | 0.30       | 1.34       | 0.07       |
| NS  | -0.80    | 0.77     | -0.73    | -0.55      | 3.51       | 0.005      | -0.29      | 1.97       | 0.07       |

A=inter-subtype reassortment rate;

B=dN/dS ratio;

C=host proportion (domestic);

$R_{AB.C}$  the partial correlation coefficient between reassortment rate and dN/dS independent of domestic proportion of 13 HA-NA subtypes;

$t_{AB.C}$ : the t value of  $R_{AB.C}$  with df =11;

$P_{AB.C}$ : the two-tailed P value of the  $t_{AB.C}$ ;

$R_{AC.B}$ : the partial correlation coefficient between reassortment rate and domestic proportion independent of dN/dS of 13 HA-NA subtypes;

$t_{AC.B}$  the t value of  $R_{AC.B}$  with df =11;

$P_{AC.B}$  : the two-tailed P value of the  $t_{AC.B}$ .

Table S4 Number of selective sites of 13 subtypes and the correlation with inter-subtype reassortment rate in each internal segment.

| Segment | Number of negative selected sites |       |       |       |       |       | Number of sequences |
|---------|-----------------------------------|-------|-------|-------|-------|-------|---------------------|
|         | PB2                               | PB1   | PA    | NP    | M1    | NS1   |                     |
| H1N1    | 53                                | 21    | 29    | 23    | 8     | 12    | 24                  |
| H3N8    | 214                               | 145   | 183   | 112   | 32    | 33    | 22                  |
| H4N6    | 195                               | 115   | 119   | 69    | 17    | 16    | 12                  |
| H5N1    | 337                               | 521   | 327   | 246   | 252   | 34    | 234                 |
| H5N2    | 324                               | 295   | 209   | 163   | 55    | 46    | 24                  |
| H5N3    | 129                               | 87    | 153   | 79    | 42    | 22    | 14                  |
| H6N1    | 336                               | 305   | 289   | 183   | 62    | 47    | 66                  |
| H6N2    | 484                               | 458   | 374   | 239   | 83    | 75    | 140                 |
| H6N5    | 38                                | 38    | 13    | 20    | 1     | 0     | 12                  |
| H7N1    | 4                                 | 29    | 7     | 1     | 2     | 6     | 40                  |
| H7N3    | 25                                | 129   | 26    | 16    | 6     | 10    | 33                  |
| H7N7    | 40                                | 66    | 70    | 27    | 11    | 7     | 12                  |
| H9N2    | 492                               | 491   | 423   | 266   | 97    | 72    | 114                 |
| R       | -0.7                              | -0.77 | -0.67 | -0.79 | -0.69 | -0.55 |                     |
| P-value | 0.007                             | 0.002 | 0.01  | 0.001 | 0.008 | 0.05  |                     |

Number of negative selected sites= the number of negative selected sites detected by SLAC for all six internal segments of each subtype.

Number of sequences=the number of sequences of each subtype being used in the analyses

R=correlation coefficient between the number of negatively selected sites and reassortment rate per subtype in each segment, with the P-value in the row below.

Table S5 Sequences for the discrete traits analysis

Information for subsampling data set A2 (n = 344, Table S1) of Eurasian AIV sequences used in this discrete traits analysis. Isolate name, subtype, host species, date of collection and the estimated decimal date are listed.

| Isolate name                           | Subtype | Host species <sup>a</sup> | Date of collection | Decimal date |
|----------------------------------------|---------|---------------------------|--------------------|--------------|
| A/mallard/Marquenterre/Z237/1983       | H1N1    | ans                       | 1983               | 1983.452     |
| A/mallard/Bavaria/185-8/2008           | H1N1    | ans                       | 22/09/2008         | 2008.723     |
| A/goose/Italy/296426/2003              | H1N1    | ans                       | 2003               | 2003.452     |
| A/duck/Italy/281904/2006               | H1N1    | ans                       | 2006               | 2006.452     |
| A/duck/Italy/69238/2007                | H1N1    | ans                       | 2007               | 2007.452     |
| A/duck/Shimane/188/1999                | H1N1    | ans                       | 1999               | 1999.452     |
| A/commonteal/Netherlands/10/2000       | H1N1    | ans                       | 23/11/2000         | 2000.893     |
| A/Anasplatyrhynchos/Belgium/12827/2007 | H3N8    | ans                       | 18/09/2007         | 2007.712     |
| A/duck/Nanchang/1681/1992              | H3N8    | ans                       | 01/12/1992         | 1992.915     |
| A/duck/Beijing/40/04                   | H3N8    | ans                       | 2004               | 2004.452     |
| A/duck/Beijing/61/05                   | H3N8    | ans                       | 2005               | 2005.452     |
| A/mallard/Sanjiang/90/2007             | H3N8    | ans                       | 2007               | 2007.452     |
| A/mallard/CzechRepublic/13577-24K/2010 | H3N8    | ans                       | 16/09/2010         | 2010.707     |
| A/duck/Hokkaido/8/1980                 | H3N8    | ans                       | 1980               | 1980.452     |
| A/mallard/Netherlands/3/2005           | H3N8    | ans                       | 2005               | 2005.452     |
| A/commoneider/Netherlands/1/2006       | H3N8    | ans                       | 2006               | 2006.452     |
| A/duck/Chabarovsk/1610/1972            | H3N8    | ans                       | 1972               | 1972.452     |
| A/gadwall/Altai/1326/2007              | H3N8    | ans                       | 2007/09/           | 2007.704     |
| A/mallard/Sweden/50/2002               | H3N8    | ans                       | 14/11/2002         | 2002.868     |
| A/duck/Ukraine/1/1963                  | H3N8    | ans                       | 12/12/1963         | 1963.945     |
| A/duck/Vietnam/G119/2006               | H3N8    | ans                       | 2006/11/           | 2006.871     |
| A/duck/Zambia/04/2008                  | H3N8    | ans                       | 2008/06/           | 2008.452     |
| A/goose/Zambia/06/2008                 | H3N8    | ans                       | 2008/07/           | 2008.534     |
| A/turnstone/Netherlands/1/2007         | H3N8    | cha                       | 2007               | 2007.452     |
| A/chicken/Vietnam/G14/2008             | H3N8    | gal                       | 2008/01/           | 2008.038     |
| A/duck/Nanchang/4-165/2000             | H4N6    | ans                       | 12/04/2000         | 2000.277     |
| A/mallard/ZhaLong/88/2004              | H4N6    | ans                       | 08/08/2004         | 2004.6       |
| A/mallard/Yanchen/2005                 | H4N6    | ans                       | 2005/10/           | 2005.786     |
| A/duck/CzechRepublic/1/1956            | H4N6    | ans                       | 11/06/1956         | 1956.441     |
| A/mallard/CzechRepublic/13579-84K/2010 | H4N6    | ans                       | 13/09/2010         | 2010.699     |
| A/duck/HongKong/365/1978               | H4N6    | ans                       | 1978               | 1978.452     |
| A/duck/Shiga/8/2004                    | H4N6    | ans                       | 2004               | 2004.452     |
| A/mallard/Netherlands/1/1999           | H4N6    | ans                       | 04/10/1999         | 1999.756     |
| A/mallard/PT/35910-2/2006              | H4N6    | ans                       | 30/10/2006         | 2006.827     |
| A/mallard/Sweden/62/2003               | H4N6    | ans                       | 05/09/2003         | 2003.677     |
| A/goose/Zambia/07/2008                 | H4N6    | ans                       | 2008/09/           | 2008.704     |
| A/dunlin/Sweden/1/2005                 | H4N6    | cha                       | 2005               | 2005.452     |
| A/crestedeagle/Belgium/01/2004         | H5N1    | acc                       | 2004               | 2004.452     |
| A/mountainhawk-eagle/Kumamoto/1/07     | H5N1    | acc                       | 2007               | 2007.452     |
| A/duck/Cambodia/D14AL/2006             | H5N1    | ans                       | 04/02/2006         | 2006.093     |
| A/Goose/Guangdong/1/96                 | H5N1    | ans                       | 1996               | 1996.452     |

|                                          |      |     |            |          |
|------------------------------------------|------|-----|------------|----------|
| A/Duck/Anyang/AVL-1/2001                 | H5N1 | ans | 2001       | 2001.452 |
| A/duck/Zhejiang/bj/2002                  | H5N1 | ans | 2002       | 2002.452 |
| A/duck/China/E319-2/03                   | H5N1 | ans | 2003       | 2003.452 |
| A/duck/Guangdong/173/04                  | H5N1 | ans | 2004       | 2004.452 |
| A/domesticgreen-wingedteal/Hunan/79/2005 | H5N1 | ans | 2005       | 2005.452 |
| A/wildduck/Liaoning/8/2006               | H5N1 | ans | 2006       | 2006.452 |
| A/duck/Hunan/11/2007                     | H5N1 | ans | 2007       | 2007.452 |
| A/duck/Hunan/3/2007                      | H5N1 | ans | 2007/10/   | 2007.786 |
| A/duck/EasternChina/108/2008             | H5N1 | ans | 15/12/2008 | 2008.953 |
| A/duck/Zhejiang/2244/2011                | H5N1 | ans | 2011/02/   | 2011.123 |
| A/cygnusolor/Croatia/1/2005              | H5N1 | ans | 2005       | 2005.452 |
| A/duck/Egypt/2253-3/2006                 | H5N1 | ans | 2006       | 2006.452 |
| A/duck/Egypt/D2br10/2007                 | H5N1 | ans | 2007/01/   | 2007.038 |
| A/duck/Egypt/0871/2008                   | H5N1 | ans | 20/02/2008 | 2008.137 |
| A/duck/France/080036/2008                | H5N1 | ans | 2008/01/   | 2008.038 |
| A/swan/Germany/R65/2006                  | H5N1 | ans | 2006/02/   | 2006.123 |
| A/domesticduck/Germany/R1779/2007        | H5N1 | ans | 2007       | 2007.452 |
| A/goose/HongKong/485.3/2000              | H5N1 | ans | 2000       | 2000.452 |
| A/Duck/HongKong/380.5/2001               | H5N1 | ans | 2001       | 2001.452 |
| A/muteswan/Hungary/4571/2006             | H5N1 | ans | 16/02/2006 | 2006.126 |
| A/goose/Tripura/103596/2008              | H5N1 | ans | 01/04/2008 | 2008.247 |
| A/duck/EastJava/UT1046/2004              | H5N1 | ans | 12/03/2004 | 2004.192 |
| A/Cygnuscygnus/Iran/754/2006             | H5N1 | ans | 2006       | 2006.452 |
| A/mallard/Italy/3401/2005                | H5N1 | ans | 2005       | 2005.452 |
| A/mallard/Italy/835/2006                 | H5N1 | ans | 2006       | 2006.452 |
| A/duck/Yokohama/aq10/2003                | H5N1 | ans | 2003       | 2003.452 |
| A/whooperswan/Akita/1/2008               | H5N1 | ans | 2008       | 2008.452 |
| A/mallard/Hokkaido/24/2009               | H5N1 | ans | 2009       | 2009.452 |
| A/duck/Fukushima/2/2011                  | H5N1 | ans | 2011/01/   | 2011.038 |
| A/duck/Laos/25/2006                      | H5N1 | ans | 2006       | 2006.452 |
| A/duck/Lao/981/2010                      | H5N1 | ans | 2010/03/   | 2010.2   |
| A/whooperswan/Mongolia/244/2005          | H5N1 | ans | 2005       | 2005.452 |
| A/commongoldeneye/Mongolia/12/2006       | H5N1 | ans | 2006/05/   | 2006.367 |
| A/whooperswan/Mongolia/6/2009            | H5N1 | ans | 2009/05/   | 2009.367 |
| A/ruddyshelduck/Mongolia/X42/2009        | H5N1 | ans | 2009/07/   | 2009.534 |
| A/duck/Niger/914/2006                    | H5N1 | ans | 2006       | 2006.452 |
| A/guineafowl/Nigeria/957-12/2006         | H5N1 | ans | 2006       | 2006.452 |
| A/goose/Krasnoozerskoye/627/2005         | H5N1 | ans | 2005       | 2005.452 |
| A/grebe/Tyva/Tyv06-1/2006                | H5N1 | ans | 24/06/2006 | 2006.477 |
| A/duck/Omsk/1822/2006                    | H5N1 | ans | 2006/07/   | 2006.534 |
| A/Cygnuscygnus/Krasnodar/329/07          | H5N1 | ans | 06/09/2007 | 2007.679 |
| A/grebe/Tyva/3/2009                      | H5N1 | ans | 22/06/2009 | 2009.471 |
| A/grebe/Tyva/2/2010                      | H5N1 | ans | 22/06/2010 | 2010.471 |
| A/swan/Slovenia/760/2006                 | H5N1 | ans | 2006       | 2006.452 |
| A/duck/Korea/ESD1/03                     | H5N1 | ans | 2003       | 2003.452 |



|                                            |      |     |            |          |
|--------------------------------------------|------|-----|------------|----------|
| A/littlegrebe/Thailand/Phichit-01/2004     | H5N1 | ans | 2004       | 2004.452 |
| A/duck/Vietnam/7A/2004                     | H5N1 | ans | 2004       | 2004.452 |
| A/duck/Vietnam/367/2005                    | H5N1 | ans | 2005       | 2005.452 |
| A/duck/Vietnam/206/2005                    | H5N1 | ans | 07/12/2005 | 2005.932 |
| A/muscovyduck/HaNam/07-47/2007             | H5N1 | ans | 2007       | 2007.452 |
| A/duck/Vietnam/G12/2008                    | H5N1 | ans | 2008/01/   | 2008.038 |
| A/muscovyduck/Vietnam/OIE-559/2011         | H5N1 | ans | 2011/06/   | 2011.452 |
| A/commongull/Chany/P/2006                  | H5N1 | cha | 18/07/2006 | 2006.542 |
| A/open-billstork/Thailand/VSMU-20-AYA/2004 | H5N1 | cic | 2004       | 2004.452 |
| A/open-billedstork/Nakhonsawan/BBD1821J/05 | H5N1 | cic | 2005       | 2005.452 |
| A/peregrinefalcon/HongKong/2142/2008       | H5N1 | fal | 2008       | 2008.452 |
| A/peregrinefalcon/Tochigi/15/2011          | H5N1 | fal | 2011/02/   | 2011.123 |
| A/sakerfalcon/Kuwait/0286/2007             | H5N1 | fal | 2007       | 2007.452 |
| A/falcon/SaudiArabia/D1795/2005            | H5N1 | fal | 2005       | 2005.452 |
| A/falcon/SaudiArabia/D1936/2007            | H5N1 | fal | 2007       | 2007.452 |
| A/chicken/Afghanistan/1573-47/2006         | H5N1 | gal | 2006       | 2006.452 |
| A/chicken/Bhutan/248009/2010               | H5N1 | gal | 20/02/2010 | 2010.137 |
| A/chicken/Cambodia/TKCMB5T/2010            | H5N1 | gal | 28/01/2010 | 2010.074 |
| A/chicken/Hubei/wj/1997                    | H5N1 | gal | 1997       | 1997.452 |
| A/chicken/Hebei/718/2001                   | H5N1 | gal | 2001       | 2001.452 |
| A/chicken/Hebei/108/02                     | H5N1 | gal | 2002       | 2002.452 |
| A/chicken/Hubei/wo/2003                    | H5N1 | gal | 2003       | 2003.452 |
| A/chicken/Jiangxi/25/2004                  | H5N1 | gal | 2004       | 2004.452 |
| A/chicken/Guangdong/1/2005                 | H5N1 | gal | 2005       | 2005.452 |
| A/chicken/Liaoning/A-11/2006               | H5N1 | gal | 2006       | 2006.452 |
| A/chicken/Liaoning/A-1/2007                | H5N1 | gal | 2007       | 2007.452 |
| A/chicken/Jiangsu/18/2008                  | H5N1 | gal | 2008       | 2008.452 |
| A/chicken/Hunan/1/2009                     | H5N1 | gal | 2009       | 2009.452 |
| A/chicken/IvoryCoast/1787-35/2006          | H5N1 | gal | 2006       | 2006.452 |
| A/turkey/IvoryCoast/4372-2/2006            | H5N1 | gal | 2006/12/   | 2006.953 |
| A/turkey/Egypt/2253-2/2006                 | H5N1 | gal | 2006       | 2006.452 |
| A/chicken/Egypt/CL6/2007                   | H5N1 | gal | 2007/03/   | 2007.2   |
| A/chicken/Egypt/0836/2008                  | H5N1 | gal | 15/01/2008 | 2008.038 |
| A/chicken/Egypt/0891/2008                  | H5N1 | gal | 26/09/2008 | 2008.734 |
| A/chicken/Germany/R3234/2007               | H5N1 | gal | 2007       | 2007.452 |
| A/Ck/HK/YU22/2002                          | H5N1 | gal | 2002       | 2002.452 |
| A/chicken/India/NIV33487/06                | H5N1 | gal | 2006       | 2006.452 |
| A/chicken/India/WB-NIV2653/2008            | H5N1 | gal | 21/01/2008 | 2008.055 |
| A/chicken/WestBengal/170564/2009           | H5N1 | gal | 09/03/2009 | 2009.184 |
| A/chicken/WestBengal/239020/2010           | H5N1 | gal | 12/01/2010 | 2010.03  |
| A/quail/Yogyakarta/UT1023/2004             | H5N1 | gal | 15/01/2004 | 2004.038 |
| A/chicken/CentralJava/UT3091/2005          | H5N1 | gal | 2005       | 2005.452 |
| A/chicken/SouthKalimantan/UT6028/2006      | H5N1 | gal | 2006/11/   | 2006.871 |
| A/chicken/Oita/8/2004                      | H5N1 | gal | 2004       | 2004.452 |
| A/chicken/Kuwait/KISR8/2007                | H5N1 | gal | 2007       | 2007.452 |

|                                     |      |     |            |          |
|-------------------------------------|------|-----|------------|----------|
| A/chicken/Laos/P0130/2007           | H5N1 | gal | 2007       | 2007.452 |
| A/chicken/Lao/LH1/2010              | H5N1 | gal | 2010/05/   | 2010.367 |
| A/chicken/Nigeria/1047-62/2006      | H5N1 | gal | 2006       | 2006.452 |
| A/chicken/Nigeria/OG11/2007         | H5N1 | gal | 2007       | 2007.452 |
| A/chicken/Rawalakot/NARC2441A/2006  | H5N1 | gal | 2006       | 2006.452 |
| A/turkey/Poland/R3249/2007          | H5N1 | gal | 2007       | 2007.452 |
| A/chicken/Kurgan/3/2005             | H5N1 | gal | 2005       | 2005.452 |
| A/chicken/Reshoty/02/2006           | H5N1 | gal | 2006/06/   | 2006.452 |
| A/chicken/Russia/Krasnodar/2/2007   | H5N1 | gal | 2007       | 2007.452 |
| A/chicken/Krasnodar/300/07          | H5N1 | gal | 05/09/2007 | 2007.677 |
| A/turkey/SaudiArabia/6732-6/2007    | H5N1 | gal | 2007       | 2007.452 |
| A/chicken/Sudan/1784-10/2006        | H5N1 | gal | 2006       | 2006.452 |
| A/chicken/KohnKaen/NIAH330/2004     | H5N1 | gal | 2004       | 2004.452 |
| A/quail/NakhonPathom/NIAH7562/2005  | H5N1 | gal | 2005       | 2005.452 |
| A/chicken/Phichit/NIAH606988/2006   | H5N1 | gal | 2006       | 2006.452 |
| A/chicken/Sukhothai/NIAH114843/2008 | H5N1 | gal | 2008       | 2008.452 |
| A/chicken/Crimea/08/2005            | H5N1 | gal | 2005       | 2005.452 |
| A/chicken/Scotland/1959             | H5N1 | gal | 1959       | 1959.452 |
| A/chicken/Vietnam/921/2004          | H5N1 | gal | 2004       | 2004.452 |
| A/chicken/LangSon/200/2005          | H5N1 | gal | 2005       | 2005.452 |
| A/chicken/Vietnam/209/2005          | H5N1 | gal | 08/12/2005 | 2005.934 |
| A/chicken/NamDinh/07-32/2007        | H5N1 | gal | 2007       | 2007.452 |
| A/piedmagpie/Liaoning/7/2006        | H5N1 | pas | 2006       | 2006.452 |
| A/magpieroobin/HongKong/1897/2008   | H5N1 | pas | 2008       | 2008.452 |
| A/crow/Assam/142119/2008            | H5N1 | pas | 2008/12/   | 2008.953 |
| A/crow/Osaka/102/2004               | H5N1 | pas | 2004       | 2004.452 |
| A/pigeon/Laos/P0022/2007            | H5N1 | pas | 2007       | 2007.452 |
| A/pigeon/Rostov-on-Don/6/2007       | H5N1 | pas | 14/12/2007 | 2007.951 |
| A/pigeon/Thailand/VSMU-7-NPT/2004   | H5N1 | pas | 2004       | 2004.452 |
| A/pigeon/Thailand/VSMU-11-KRI/2005  | H5N1 | pas | 2005       | 2005.452 |
| A/egret/HongKong/757.2/2003         | H5N1 | pel | 2003       | 2003.452 |
| A/greyheron/HongKong/3088/2007      | H5N1 | pel | 2007       | 2007.452 |
| A/greyheron/HongKong/1046/2008      | H5N1 | pel | 2008       | 2008.452 |
| A/ostrich/Suzhou/097/2003           | H5N1 | str | 16/04/2003 | 2003.288 |
| A/ostrich/Nigeria/1047-25/2006      | H5N1 | str | 2006       | 2006.452 |
| A/garganey/SanJiang/160/2006        | H5N2 | ans | 2006       | 2006.452 |
| A/duck/Denmark/65047/04             | H5N2 | ans | 2004       | 2004.452 |
| A/duck/France/080032/2008           | H5N2 | ans | 2008/01/   | 2008.038 |
| A/duck/Potsdam/1402-6/1986          | H5N2 | ans | 1986       | 1986.452 |
| A/duck/HongKong/342/78              | H5N2 | ans | 1978       | 1978.452 |
| A/teal/Italy/3931-38/2005           | H5N2 | ans | 2005       | 2005.452 |
| A/mallard/Italy/4223-2/2006         | H5N2 | ans | 11/11/2006 | 2006.86  |
| A/northernpintail/Akita/714/2006    | H5N2 | ans | 2006/12/   | 2006.953 |
| A/duck/Malaysia/F118-08-04/2004     | H5N2 | ans | 2004       | 2004.452 |
| A/mallard/Netherlands/3/1999        | H5N2 | ans | 09/10/1999 | 1999.77  |
| A/duck/Primorie/2621/2001           | H5N2 | ans | 24/08/2001 | 2001.644 |

|                                       |      |     |            |          |
|---------------------------------------|------|-----|------------|----------|
| A/gadwall/Altai/1202/2007             | H5N2 | ans | 2007/09/   | 2007.704 |
| A/mallard/Sweden/74/2003              | H5N2 | ans | 2003       | 2003.452 |
| A/turkey/Italy/1980                   | H5N2 | gal | 1980       | 1980.452 |
| A/poultry/Italy/382/1997              | H5N2 | gal | 1997       | 1997.452 |
| A/turkey/Italy/1258/2005              | H5N2 | gal | 2005       | 2005.452 |
| A/duck/France/02166/2002              | H5N3 | ans | 2002       | 2002.452 |
| A/duck/France/06436/2006              | H5N3 | ans | 21/03/2006 | 2006.216 |
| A/mallard/France/061054/2006          | H5N3 | ans | 07/11/2006 | 2006.849 |
| A/duck/HongKong/205/1977              | H5N3 | ans | 1977       | 1977.452 |
| A/goose/HongKong/23/1978              | H5N3 | ans | 1978       | 1978.452 |
| A/duck/Italy/775/2004                 | H5N3 | ans | 2004       | 2004.452 |
| A/teal/Italy/3812/2005                | H5N3 | ans | 2005       | 2005.452 |
| A/mallard/Netherlands/65/2006         | H5N3 | ans | 2006       | 2006.452 |
| A/duck/Altai/1285/1991                | H5N3 | ans | 15/08/1991 | 1991.619 |
| A/duck/Primorie/2633/2001             | H5N3 | ans | 24/08/2001 | 2001.644 |
| A/spot-billedduck/Korea/KNUSYG06/2006 | H5N3 | ans | 2006       | 2006.452 |
| A/tern/SouthAfrica/1961               | H5N3 | cha | 1961       | 1961.452 |
| A/mallard/Jiangxi/7787/2003           | H6N1 | ans | 2003       | 2003.452 |
| A/duck/Shantou/1275/2004              | H6N1 | ans | 2004       | 2004.452 |
| A/mallard/Jiangxi/13228/2005          | H6N1 | ans | 2005       | 2005.452 |
| A/duck/EasternChina/1/2008            | H6N1 | ans | 2008/11/   | 2008.871 |
| A/duck/HongKong/d73/1976              | H6N1 | ans | 1976       | 1976.452 |
| A/Teal/HongKong/W312/97               | H6N1 | ans | 1997       | 1997.452 |
| A/greylaggoose/Netherlands/4/1999     | H6N1 | ans | 01/03/1999 | 1999.162 |
| A/mallard/Sweden/81/2002              | H6N1 | ans | 03/12/2002 | 2002.921 |
| A/mallard/Sweden/30/2005              | H6N1 | ans | 2005       | 2005.452 |
| A/duck/Taiwan/0526/72                 | H6N1 | ans | 1972       | 1972.452 |
| A/duck/Taiwan/WB29/99                 | H6N1 | ans | 1999       | 1999.452 |
| A/duck/Taiwan/29-3/00                 | H6N1 | ans | 2000       | 2000.452 |
| A/duck/Taiwan/WB239/03                | H6N1 | ans | 2003       | 2003.452 |
| A/chicken/HongKong/17/1977            | H6N1 | gal | 1977       | 1977.452 |
| A/quail/HongKong/1721-30/99           | H6N1 | gal | 1999       | 1999.452 |
| A/quail/HongKong/SF595/00             | H6N1 | gal | 2000       | 2000.452 |
| A/pheasant/HongKong/SSP44/2002        | H6N1 | gal | 2002       | 2002.452 |
| A/chukkar/HongKong/SF126/2003         | H6N1 | gal | 2003       | 2003.452 |
| A/chicken/Taiwan/0824/97              | H6N1 | gal | 1997       | 1997.452 |
| A/chicken/Taiwan/na3/98               | H6N1 | gal | 1998       | 1998.452 |
| A/chicken/Taiwan/0705/99              | H6N1 | gal | 1999       | 1999.452 |
| A/chicken/Taiwan/SP1/00               | H6N1 | gal | 2000       | 2000.452 |
| A/chicken/Taiwan/1205/01              | H6N1 | gal | 2001       | 2001.452 |
| A/chicken/Taiwan/0208/02              | H6N1 | gal | 2002       | 2002.452 |
| A/chicken/Taiwan/1203/03              | H6N1 | gal | 2003       | 2003.452 |
| A/chicken/Taiwan/ch1006/04            | H6N1 | gal | 2004       | 2004.452 |
| A/chicken/Taiwan/A342/05              | H6N1 | gal | 2005       | 2005.452 |
| A/pigeon/HongKong/WF47/2003           | H6N1 | pas | 2003       | 2003.452 |

|                                        |      |     |            |          |
|----------------------------------------|------|-----|------------|----------|
| A/partridge/Taiwan/LU1/99              | H6N1 | pas | 1999       | 1999.452 |
| A/wildduck/Shantou/1651/2000           | H6N2 | ans | 2000       | 2000.452 |
| A/duck/Shantou/2444/2001               | H6N2 | ans | 2001       | 2001.452 |
| A/duck/Shantou/2471/2002               | H6N2 | ans | 2002       | 2002.452 |
| A/mallard/Jiangxi/7376/2003            | H6N2 | ans | 2003       | 2003.452 |
| A/mallard/Jiangxi/8264/2004            | H6N2 | ans | 2004       | 2004.452 |
| A/duck/Shantou/7568/2005               | H6N2 | ans | 2005       | 2005.452 |
| A/mallard/HeiLongjiang/131/2006        | H6N2 | ans | 2006       | 2006.452 |
| A/duck/EasternChina/40/2007            | H6N2 | ans | 2007/05/   | 2007.367 |
| A/duck/EasternChina/46/2008            | H6N2 | ans | 2008/04/   | 2008.285 |
| A/duck/EasternChina/2/2008             | H6N2 | ans | 2008/12/   | 2008.953 |
| A/mallard/CzechRepublic/15902-17K/2009 | H6N2 | ans | 30/09/2009 | 2009.745 |
| A/duck/HongKong/d134/1977              | H6N2 | ans | 1977       | 1977.452 |
| A/whitefrontedgoose/Netherlands/2/1999 | H6N2 | ans | 02/03/1999 | 1999.164 |
| A/barnaclegoose/Netherlands/1/2005     | H6N2 | ans | 2005       | 2005.452 |
| A/mallard/Netherlands/71/2006          | H6N2 | ans | 2006       | 2006.452 |
| A/aquaticbird/Korea/CN17/2009          | H6N2 | ans | 2009/11/   | 2009.871 |
| A/mallard/Sweden/52/2003               | H6N2 | ans | 30/10/2003 | 2003.827 |
| A/duck/Kingmen/E322/04                 | H6N2 | ans | 2004       | 2004.452 |
| A/Muscovyduck/Vietnam/G33/2007         | H6N2 | ans | 2007/09/   | 2007.704 |
| A/duck/Zambia/03/2008                  | H6N2 | ans | 2008/06/   | 2008.452 |
| A/duck/Zambia/10/2009                  | H6N2 | ans | 2009/09/   | 2009.704 |
| A/gull/Moscow/3100/2006                | H6N2 | cha | 2006/10/   | 2006.786 |
| A/chicken/Hunan/989/2005               | H6N2 | gal | 2005       | 2005.452 |
| A/chicken/EasternChina/42/2007         | H6N2 | gal | 2007/06/   | 2007.452 |
| A/duck/Hunan/5613/2003                 | H6N5 | ans | 2003       | 2003.452 |
| A/mallard/Jiangxi/8346/2004            | H6N5 | ans | 2004       | 2004.452 |
| A/duck/Hunan/748/2005                  | H6N5 | ans | 2005       | 2005.452 |
| A/duck/Yangzhou/013/2008               | H6N5 | ans | 15/12/2008 | 2008.953 |
| A/mallard/Netherlands/11/2007          | H6N5 | ans | 2007       | 2007.452 |
| A/aquaticbird/Korea/W69/2005           | H6N5 | ans | 2005/11/   | 2005.871 |
| A/aquaticbird/Korea/CN5/2009           | H6N5 | ans | 2009/11/   | 2009.871 |
| A/duck/Taiwan/WB459/04                 | H6N5 | ans | 2004       | 2004.452 |
| A/duck/Nanchang/1904/1992              | H7N1 | ans | 1992       | 1992.452 |
| A/duck/Denmark/53-147-8/2008           | H7N1 | ans | 25/04/2008 | 2008.312 |
| A/guineafowl/Italy/155/2000            | H7N1 | ans | 11/01/2000 | 2000.027 |
| A/duck/Mongolia/47/2001                | H7N1 | ans | 2001       | 2001.452 |
| A/duck/Mongolia/867/2002               | H7N1 | ans | 2002       | 2002.452 |
| A/mallard/Netherlands/22/2007          | H7N1 | ans | 2007       | 2007.452 |
| A/chicken/Italy/1391/1999              | H7N1 | gal | 16/04/1999 | 1999.288 |
| A/chicken/Italy/2335/2000              | H7N1 | gal | 31/03/2000 | 2000.244 |
| A/turkey/Italy/1351/2001               | H7N1 | gal | 15/02/2001 | 2001.123 |
| A/ostrich/Italy/984/00                 | H7N1 | str | 2000       | 2000.452 |
| A/mallard/Netherlands/12/2000          | H7N3 | ans | 2000       | 2000.452 |
| A/tuftedduck/PT/13771/2006             | H7N3 | ans | 22/03/2006 | 2006.219 |
| A/turkey/Italy/8534/2002               | H7N3 | gal | 2002       | 2002.452 |

|                                       |      |     |            |          |
|---------------------------------------|------|-----|------------|----------|
| A/duck/Korea/BC10/2007                | H7N3 | ans | 2007/03/   | 2007.216 |
| A/duck/Shimane/137/2006               | H7N3 | ans | 2006       | 2006.452 |
| A/chicken/Pakistan/34669/1995         | H7N3 | gal | 1995       | 1995.452 |
| A/chicken/Pakistan/c1998/1998         | H7N3 | gal | 1998       | 1998.452 |
| A/chicken/Chakwal/NARC-35/2001        | H7N3 | gal | 2001/05/   | 2001.367 |
| A/chicken/Rawalpindi/NARC68/2002      | H7N3 | gal | 2002       | 2002.452 |
| A/chicken/Chakwal/NARC-148/2004       | H7N3 | gal | 12/05/2004 | 2004.359 |
| A/swan/CzechRepublic/5416/2011        | H7N7 | ans | 06/04/2011 | 2011.26  |
| A/mallard/Netherlands/9/2005          | H7N7 | ans | 2005       | 2005.452 |
| A/swan/Slovenia/53/2009               | H7N7 | ans | 20/01/2009 | 2009.052 |
| A/duck/Tsukuba/664/2007               | H7N7 | ans | 2007/12/   | 2007.953 |
| A/mallard/Sweden/95/2005              | H7N7 | ans | 2005       | 2005.452 |
| A/chicken/Germany/R28/03              | H7N7 | gal | 2003       | 2003.452 |
| A/chicken/Netherlands/1/03            | H7N7 | gal | 2003       | 2003.452 |
| A/duck/Korea/JSM/2010                 | H7N7 | ans | 2010/06/   | 2010.452 |
| A/duck/Nanjing/2/97                   | H9N2 | ans | 1997       | 1997.452 |
| A/wildduck/Nanchang/2-0480/2000       | H9N2 | ans | 17/02/2000 | 2000.129 |
| A/duck/Hubei/W1/2004                  | H9N2 | ans | 2004       | 2004.452 |
| A/duck/Guangxi/51/2005                | H9N2 | ans | 2005       | 2005.452 |
| A/duck/Fujian/FQ107/2007              | H9N2 | ans | 2007/12/   | 2007.953 |
| A/duck/Tibet/S2/2009                  | H9N2 | ans | 10/09/2009 | 2009.69  |
| A/mallard/France/090360/2009          | H9N2 | ans | 2009/09/   | 2009.704 |
| A/duck/HongKong/702/1979-quailadapted | H9N2 | ans | 1979       | 1979.452 |
| A/duck/HongKong/784/1979              | H9N2 | ans | 10/10/1979 | 1979.773 |
| A/duck/Hokkaido/49/98                 | H9N2 | ans | 1998       | 1998.452 |
| A/duck/Hokkaido/9/99                  | H9N2 | ans | 1999       | 1999.452 |
| A/duck/Malaysia/2001                  | H9N2 | ans | 2001       | 2001.452 |
| A/Eurasianwigeon/Netherlands/3/2005   | H9N2 | ans | 2005       | 2005.452 |
| A/gadwall/Netherlands/1/2006          | H9N2 | ans | 2006       | 2006.452 |
| A/Bewicksswan/Netherlands/5/2007      | H9N2 | ans | 2007       | 2007.452 |
| A/duck/Korea/KNUDPJ09/2009            | H9N2 | ans | 2009/05/   | 2009.367 |
| A/chicken/Shandong/7/96               | H9N2 | gal | 1996       | 1996.452 |
| A/chicken/Shenzhen/9/97               | H9N2 | gal | 1997       | 1997.452 |
| A/chicken/Beijing/8/98                | H9N2 | gal | 1998       | 1998.452 |
| A/chicken/Ningxia/4/99                | H9N2 | gal | 1999       | 1999.452 |
| A/quail/Nanchang/2-0460/2000          | H9N2 | gal | 17/02/2000 | 2000.129 |
| A/chicken/China/Guangxi14/2000        | H9N2 | gal | 13/11/2000 | 2000.866 |
| A/chicken/Henan/43/02                 | H9N2 | gal | 2002       | 2002.452 |
| A/chicken/Guangxi/37/2005             | H9N2 | gal | 2005       | 2005.452 |
| A/chicken/Hebei/L1/2006               | H9N2 | gal | 2006       | 2006.452 |
| A/chicken/Hubei/C1/2007               | H9N2 | gal | 2007       | 2007.452 |
| A/chicken/Henan/1.2/2008              | H9N2 | gal | 10/01/2008 | 2008.025 |
| A/chicken/Hebei/Y2/2009               | H9N2 | gal | 2009/03/   | 2009.2   |
| A/chicken/Tibet/S1/2009               | H9N2 | gal | 10/09/2009 | 2009.69  |
| A/chicken/China/AH-10-01/2010         | H9N2 | gal | 02/12/2010 | 2010.918 |
| A/chicken/Guangdong/ZCY/2011          | H9N2 | gal | 2011/07/   | 2011.534 |

|                                      |      |     |            |          |
|--------------------------------------|------|-----|------------|----------|
| A/chicken/Uchal/8286/2006            | H9N2 | gal | 25/02/2006 | 2006.151 |
| A/chicken/Israel/90658/2000          | H9N2 | gal | 2000       | 2000.452 |
| A/turkey/Israel/810/2001             | H9N2 | gal | 2001       | 2001.452 |
| A/turkey/Israel/619/2002             | H9N2 | gal | 2002       | 2002.452 |
| A/chicken/Israel/1475/2003           | H9N2 | gal | 2003       | 2003.452 |
| A/chicken/Israel/1966/2004           | H9N2 | gal | 2004       | 2004.452 |
| A/chicken/Israel/554/2005            | H9N2 | gal | 2005       | 2005.452 |
| A/chicken/Israel/178/2006            | H9N2 | gal | 2006       | 2006.452 |
| A/chicken/Israel/375/2007            | H9N2 | gal | 06/03/2007 | 2007.175 |
| A/chicken/Israel/310/2008            | H9N2 | gal | 27/06/2008 | 2008.485 |
| A/chicken/Israel/184/2009            | H9N2 | gal | 15/02/2009 | 2009.123 |
| A/chicken/Osaka/aq48/97              | H9N2 | gal | 1997       | 1997.452 |
| A/chicken/Osaka/aq19/2001            | H9N2 | gal | 2001       | 2001.452 |
| A/chicken/Yokohama/aq45/2002         | H9N2 | gal | 2002       | 2002.452 |
| A/quail/Lebanon/272/2010             | H9N2 | gal | 2010/08/   | 2010.619 |
| A/chicken/Pakistan/2/99              | H9N2 | gal | 1999       | 1999.452 |
| A/chicken/Pakistan/UDL-01/2005       | H9N2 | gal | 18/05/2005 | 2005.375 |
| A/chicken/Pakistan/UDL-03/2005       | H9N2 | gal | 21/12/2005 | 2005.97  |
| A/chicken/Pakistan/UDL-01/2007       | H9N2 | gal | 07/06/2007 | 2007.43  |
| A/chicken/Pakistan/UDL-03/2008       | H9N2 | gal | 04/03/2008 | 2008.17  |
| A/Korea/KBNP-0028/2000               | H9N2 | gal | 2000       | 2000.452 |
| A/chicken/Korea/S21/2004             | H9N2 | gal | 2004       | 2004.452 |
| A/chicken/Korea/GH2/2007             | H9N2 | gal | 24/11/2007 | 2007.896 |
| A/chicken/Korea/KNUSWR09/2009        | H9N2 | gal | 2009/04/   | 2009.285 |
| A/chicken/Dubai/338/2001             | H9N2 | gal | 2001       | 2001.452 |
| A/chicken/Emirates/R66/2002          | H9N2 | gal | 2002       | 2002.452 |
| A/pigeon/Nanchang/2-0461/2000        | H9N2 | pas | 17/02/2000 | 2000.129 |
| A/black-billedmagpie/Guangxi/31/2005 | H9N2 | pas | 2005/05/   | 2005.367 |
| A/parakeet/Chiba/1/97                | H9N2 | psi | 1997       | 1997.452 |
| A/parakeet/Narita/92A/98             | H9N2 | psi | 1998       | 1998.452 |

<sup>a</sup>: The abbreviations of bird orders being used in this study:

acc: Accipitriformes

ans: Anseriformes

cha: Charadriiformes

cic: Ciconiiformes

cor Coraciiformes

col Columbiformes

cuc Cuculiformes

gal: Galliformes

gru: Gruiformes

Fal: Falconiformes

pas: Passeriformes

pel Pelecaniforms

pic Piciformes

pro: Procellariiformes

psi Psittaciformes

rhe: Rheiformes

str: Struthioniformes
